# Supplementary material for: Predicting biomass of hyperdiverse and structurally complex central Amazonian forests – a virtual approach using extensive field data
Source: Copernicus journal article supplement (doi:10.5194/bg-13-1553-2016), 2016-03-11
Supplement: Supplementary file [file bg-13-1553-2016-supplement.pdf]

Supplement of Biogeosciences, 13, 1553–1570, 2016  
<http://www.biogeosciences.net/13/1553/2016/>  
doi:10.5194/bg-13-1553-2016-supplement  
© Author(s) 2016. CC Attribution 3.0 License.

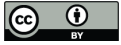

Biogeosciences  Open Access

*Supplement of*

## **Predicting biomass of hyperdiverse and structurally complex central Amazonian forests – a virtual approach using extensive field data**

**Daniel Magnabosco Marra et al.**

*Correspondence to:* D. Magnabosco Marra ([dmarra@bgc-jena.mpg.de](mailto:dmarra@bgc-jena.mpg.de))

The copyright of individual parts of the supplement might differ from the CC-BY 3.0 licence.

1 Supplement

2 Tables

3 Table S1. Summary of the dataset (727 trees from 101 genera and at least 135 tree species) included in this study.

| No. | Family           | Species                                                          | Common name                    | NT | DBH range | H range   | WD    | WD level | SG  | AGB range   |
|-----|------------------|------------------------------------------------------------------|--------------------------------|----|-----------|-----------|-------|----------|-----|-------------|
| 1   | Anacardiaceae    | <i>Astronium lecointei</i> Ducke                                 | muiracatiara                   | 1  | 8.5       | 11.3      | 0.752 | spp      | lat | 39.3        |
| 2   | Anacardiaceae    | <i>Thyrsodium guianense</i> Sagot ex Marchand                    | breu de leite                  | 9  | 5.6-17.7  | 4.2-19.5  | 0.630 | spp      | mid | 8.0-245.1   |
| 3   | Annonaceae       | <i>Annona neoinsignis</i> H.Rainer                               | envira bobó                    | 10 | 5.4-24.3  | 6.9-19.8  | 0.430 | spp      | pio | 5.4-288.2   |
| 4   | Annonaceae       | <i>Bocageopsis multiflora</i> (Mart.) R.E. Fr.                   | envira surucucu                | 2  | 6.0-21.4  | 9.0-28.5  | 0.643 | spp      | mid | 22.2-712.2  |
| 5   | Annonaceae       | <i>Duguetia</i> spp.                                             | envira vermelha                | 4  | 6.5-13.9  | 12-17.5   | 0.787 | gen      | lat | 23.5-165.1  |
| 6   | Annonaceae       | <i>Duguetia surinamensis</i> R.E. Fr.                            | envira amarela                 | 2  | 5.2-5.5   | 6.0-7.3   | 0.800 | spp      | lat | 15.2-15.8   |
| 7   | Annonaceae       | <i>Guatteria olivacea</i> R.E. Fr.                               | envira fofa, envira preta lisa | 13 | 6.8-34.2  | 11-25.6   | 0.510 | spp      | pio | 26.6-1690.2 |
| 8   | Annonaceae       | <i>Guatteria</i> spp.                                            | envira branca                  | 3  | 5.9-16.6  | 10.8-17.8 | 0.556 | gen      | pio | 14.4-206.6  |
| 9   | Annonaceae       | ni                                                               | envira                         | 1  | 12.4      | 18.5      | 0.630 | fam      | mid | 102.9       |
| 10  | Annonaceae       | <i>Unonopsis stipitata</i> Diels                                 | envira preta cascuda           | 2  | 5.5-6.5   | 8.0-10.8  | 0.686 | spp      | mid | 12.7-33.9   |
| 11  | Annonaceae       | <i>Xylopia benthamii</i> R.E. Fr.                                | envira taripucu, embiriba      | 10 | 6.6-17.8  | 5.9-19.2  | 0.600 | spp      | mid | 20.7-210.2  |
| 12  | Annonaceae       | <i>Xylopia</i> spp.                                              | envira pimenta                 | 4  | 7.7-12.0  | 9.8-16.0  | 0.626 | gen      | mid | 31.1-137.5  |
| 13  | Apocynaceae      | <i>Aspidosperma desmanthum</i> Benth. ex Müll. Arg.              | pequiá marfim                  | 1  | 85.0      | 33.0      | 0.610 | spp      | lat | 7509.1      |
| 14  | Apocynaceae      | <i>Couma guianensis</i> Aubl.                                    | sorvinha                       | 1  | 7.0       | 8.9       | 0.560 | spp      | lat | 27.0        |
| 15  | Apocynaceae      | <i>Couma utilis</i> (Mart.) Müll. Arg.                           | sorva                          | 1  | 8.5       | 14.5      | 0.660 | spp      | lat | 35.0        |
| 16  | Apocynaceae      | <i>Geissospermum argenteum</i> Woodson                           | acariquara branca              | 3  | 5.2-9.8   | 7.6-13.0  | 0.760 | gen      | lat | 15.6-66.3   |
| 17  | Araliaceae       | <i>Schefflera morototoni</i> (Aubl.) Maguire, Steyerem. & Frodin | morototó                       | 12 | 5.8-33.1  | 9.0-27.0  | 0.437 | spp      | pio | 9.0-909.3   |
| 18  | Bignoniaceae     | <i>Jacaranda copaia</i> (Aubl.) D. Don                           | jacaranda, pará pará           | 1  | 13.5      | 17.8      | 0.348 | spp      | pio | 69.8        |
| 19  | Boraginaceae     | <i>Cordia</i> cf. <i>naidophylla</i>                             | freijó                         | 2  | 5.6-6.4   | 8.6-10.3  | 0.520 | gen      | mid | 14.2-28.4   |
| 20  | Burseraceae      | <i>Protium decandrum</i> (Aubl.) Marchand                        | breu branco                    | 5  | 5.8-9.3   | 9.9-15.4  | 0.560 | spp      | mid | 15.3-58.5   |
| 21  | Burseraceae      | <i>Protium hebetatum</i> D.C. Daly                               | breu vermelho                  | 11 | 5.2-30.0  | 4.2-25.0  | 0.579 | gen      | mid | 7.7-1258.9  |
| 22  | Burseraceae      | <i>Protium</i> sp.                                               | breu                           | 1  | 10.7      | 15.0      | 0.579 | gen      | mid | 74.7        |
| 23  | Burseraceae      | <i>Protium trifoliolatum</i> Engl.                               | breu peludo                    | 1  | 6.5       | 12.0      | 0.640 | spp      | mid | 20.8        |
| 24  | Burseraceae      | <i>Tetragastris panamensis</i> (Engl.) Kuntze                    | breu manga                     | 13 | 5.0-17.5  | 3.9-19.0  | 0.742 | spp      | mid | 7.9-159.1   |
| 25  | Caryocaraceae    | <i>Caryocar pallidum</i> A.C. Sm.                                | piquiarana                     | 2  | 5.9-8.1   | 8.8-12.6  | 0.680 | spp      | lat | 21.4-75.8   |
| 26  | Chrysobalanaceae | <i>Acioa longipendula</i> (Pilg.) Sothers & Prance               | castanha de galinha            | 1  | 48.3      | 29.2      | 0.940 | spp      | lat | 3994.5      |
| 27  | Chrysobalanaceae | <i>Licania coriacea</i> Benth.                                   | marí bravo                     | 4  | 5.8-10.5  | 10.5-12.3 | 0.880 | spp      | lat | 19.9-113.7  |
| 28  | Chrysobalanaceae | <i>Licania heteromorpha</i> Benth.                               | macucú fofó                    | 1  | 7.0       | 14.3      | 0.740 | spp      | lat | 38.8        |
| 29  | Chrysobalanaceae | <i>Licania oblongifolia</i> Standl.                              | macucú chador                  | 2  | 5.0-13.5  | 8.5-17.6  | 0.878 | spp      | lat | 19.1-178.6  |

|    |                  |                                                                  |                           |    |           |           |       |     |     |                      |
|----|------------------|------------------------------------------------------------------|---------------------------|----|-----------|-----------|-------|-----|-----|----------------------|
| 30 | Chrysobalanaceae | <i>Licania</i> spp.                                              | macucú                    | 5  | 5.2-9.9   | 7.5-17.8  | 0.822 | gen | lat | 16.7-121.3           |
| 31 | Clusiaceae       | <i>Tovomita</i> spp.                                             | sapateiro                 | 2  | 8.7-37.0  | 17.2-28.4 | 0.799 | gen | mid | 69.0-1624.7          |
| 32 | Combretaceae     | <i>Buchenavia</i> sp.                                            | tanimbuca                 | 1  | 33.8      | 17.9      | 0.719 | gen | lat | 1801.4               |
| 33 | Connaraceae      | <i>Connarus perrottetii</i> (DC.) Planch.                        | sacaca brava              | 28 | 5.2-8.9   | 6.2-12.3  | 0.450 | gen | pio | 15.0-69.0            |
| 34 | Dichapetalaceae  | <i>Tapura amazonica</i> Poepp.                                   | tapura                    | 2  | 20-21.2   | 18.9-21.2 | 0.711 | gen | mid | 355.8-599.8          |
| 35 | Elaeocarpaceae   | <i>Sloanea</i> sp.                                               | urucurana                 | 1  | 5.8       | 7.6       | 0.827 | gen | lat | 21.2                 |
| 36 | Euphorbiaceae    | <i>Alchorneopsis</i> sp.                                         | supiarana                 | 1  | 19.5      | 23.0      | 0.390 | gen | pio | 336.5                |
| 37 | Euphorbiaceae    | <i>Croton draconoides</i> Müll. Arg.                             | sacaca                    | 6  | 5.1-7.9   | 5.7-12.0  | 0.626 | gen | pio | 9.0-20.5             |
| 38 | Euphorbiaceae    | <i>Croton matourensis</i> Aubl.                                  | dima                      | 69 | 5.4-28.7  | 8.7-26.5  | 0.620 | spp | pio | 12.9-1066.6          |
| 39 | Euphorbiaceae    | <i>Hevea guianensis</i> Aubl.                                    | seringa vermelha          | 1  | 8.0       | 11.6      | 0.575 | spp | lat | 39.1                 |
| 40 | Euphorbiaceae    | <i>Mabea angularis</i> Hollander                                 | taquari branco            | 4  | 7.0-11.8  | 10.0-16.2 | 0.634 | gen | mid | 20.6-105.0           |
| 41 | Euphorbiaceae    | <i>Mabea piriri</i> Aubl.                                        | taquari vermelho          | 21 | 5.3-16.5  | 6.4-24.2  | 0.617 | spp | mid | 13.5-321.5           |
| 42 | Euphorbiaceae    | <i>Mabea</i> spp.                                                | taquari                   | 5  | 6.2-9.3   | 11.8-15.0 | 0.634 | gen | mid | 22.6-58.2            |
| 43 | Euphorbiaceae    | <i>Micrandra</i> spp.                                            | seringarana               | 12 | 5.1-35.0  | 7.4-27.5  | 0.848 | gen | lat | 15.9-1677.5          |
| 44 | Euphorbiaceae    | <i>Micrandropsis scleroxylon</i> (W.A. Rodrigues) W.A. Rodrigues | piãozinho                 | 11 | 5.7-32.4  | 7.2-25.0  | 0.880 | spp | lat | 22.9-1235.5          |
| 45 | Euphorbiaceae    | <i>Pogonophora schomburgkiana</i> Miers ex Benth.                | amarelinho                | 1  | 5.6       | 10.0      | 0.833 | spp | lat | 48.2                 |
| 46 | Fabaceae         | <i>Andira micrantha</i> Ducke                                    | sucupira preta            | 2  | 6.0-8.1   | 7.5-12.3  | 1.000 | spp | lat | 19.0-45.1            |
| 47 | Fabaceae         | <i>Andira</i> spp.                                               | sucupira                  | 3  | 5.2-35.0  | 10.0-30.0 | 0.730 | gen | lat | 15.4-2012.2          |
| 48 | Fabaceae         | <i>Bocoa viridiflora</i> (Ducke) R.S. Cowan                      | muirajiboia preta         | 1  | 22.6      | 20.8      | 0.835 | spp | lat | 1165.0               |
| 49 | Fabaceae         | <i>Cedrelinga cateniformis</i> (Ducke) Ducke                     | cedrorana                 | 1  | 55.0      | 34.1      | 0.480 | spp | lat | 3754.2               |
| 50 | Fabaceae         | <i>Dipteryx magnifica</i> Ducke                                  | cumarurana                | 1  | 7.0       | 16.0      | 0.940 | gen | lat | 43.3                 |
| 51 | Fabaceae         | <i>Eperua glabriflora</i> (Ducke) R.S. Cowan                     | muirapiranga              | 3  | 7.5-30.5  | 9.4-20.5  | 0.759 | spp | lat | 23.8-1304.4          |
| 52 | Fabaceae         | <i>Inga</i> cf. <i>pezizifera</i>                                | ingá vermelha             | 14 | 5.5-31.3  | 7.0-23.0  | 0.650 | spp | pio | 14.0-1562.8          |
| 53 | Fabaceae         | <i>Inga</i> spp.                                                 | ingá branca               | 11 | 5.3-24.9  | 5.9-22.5  | 0.614 | gen | mid | 8.3-485.8            |
| 54 | Fabaceae         | <i>Inga thibaudiana</i> DC.                                      | ingá peluda               | 5  | 9.231.9   | 15-22.7   | 0.657 | spp | mid | 62.2-1509.0          |
| 55 | Fabaceae         | <i>Macrolobium</i> spp.                                          | ingarana                  | 3  | 10.3-19.5 | 14.3-17.0 | 0.606 | gen | mid | 78.3-374.9           |
| 56 | Fabaceae         | <i>Ormosia</i> spp.                                              | tento                     | 5  | 8.0-37.5  | 12.7-25.4 | 0.676 | gen | mid | 30.5-1606.9          |
| 57 | Fabaceae         | <i>Parkia</i> sp.                                                | fava parkia               | 2  | 6.5-9.5   | 9.0-12.5  | 0.532 | gen | lat | 10.6-85.0<br>1240.0- |
| 58 | Fabaceae         | <i>Pterocarpus rohrii</i> Vahl                                   | mututí                    | 2  | 29.8-35.5 | 27.3-34.5 | 0.550 | spp | mid | 1740.6               |
| 59 | Fabaceae         | <i>Stryphnodendron guianense</i> (Aubl.) Benth.                  | fava camuzé               | 14 | 5.5-32.9  | 9.5-27.0  | 0.650 | spp | mid | 7.5-1120.5           |
| 60 | Fabaceae         | <i>Swartzia ingifolia</i> Ducke                                  | acapú amarelo, ingá ferro | 1  | 40.4      | 21.6      | 0.815 | spp | lat | 1345.3               |
| 61 | Fabaceae         | <i>Swartzia</i> cf. <i>recurva</i>                               | muirajiboia amarela       | 2  | 7.7-12.0  | 11.7-17.2 | 0.883 | gen | lat | 39.7-155.5           |
| 62 | Fabaceae         | <i>Tachigali setifera</i> (Ducke) Zarucchi & Herend.             | tachi preto               | 1  | 7.0       | 17.2      | 0.670 | spp | pio | 36.5                 |
| 63 | Fabaceae         | <i>Zygia racemosa</i> (Ducke) Barneby & J.W. Grimes              | angelim pedra             | 3  | 6.2-10.7  | 9.0-15.5  | 0.748 | spp | lat | 23.9-82.9            |
| 64 | Fabaceae         | <i>Zygia ramiflora</i> (F. Muell.) Kosterm.                      | ingá copaiba              | 2  | 7.2       | 8.4-11.3  | 0.727 | gen | mid | 16.8-33.0            |
| 65 | Goupiaceae       | <i>Goupia glabra</i> Aubl.                                       | cupiúba                   | 17 | 5.1-14.2  | 7.7-17.0  | 0.730 | spp | mid | 12.9-216.4           |
| 66 | Humiriaceae      | <i>Endopleura</i> spp.                                           | uchí amarelo              | 1  | 9.0       | 16.8      | 0.775 | gen | lat | 72.0                 |
| 67 | Humiriaceae      | ni.2                                                             | uchí preto                | 1  | 14.0      | 18.5      | 0.819 | fam | lat | 281.2                |

|     |                 |                                            |                             |    |           |            |       |     |     |             |
|-----|-----------------|--------------------------------------------|-----------------------------|----|-----------|------------|-------|-----|-----|-------------|
| 68  | Humiriaceae     | <i>Sacoglottis ceratocarpa</i> Ducke       | uchí coco                   | 1  | 9.5       | 12.5       | 0.807 | gen | lat | 109.9       |
| 69  | Humiriaceae     | <i>Vantanea</i> sp.                        | uchirana                    | 1  | 19.0      | 17.6       | 0.857 | gen | lat | 324.8       |
| 70  | Hypericaceae    | <i>Vismia guianensis</i> (Aubl.) Pers.     | lacre branco                | 15 | 6.1-23.8  | 8.6-23.5   | 0.475 | spp | pio | 12.0-508.1  |
| 71  | Lauraceae       | <i>Aniba ferrea</i> Kubitzki               | louro chumbo                | 1  | 29.8      | 26.6       | 0.709 | gen | lat | 1484.5      |
| 72  | Lauraceae       | ni.3                                       | louro amarelo               | 1  | 9.2       | 14.5       | 0.656 | fam | mid | 58.1        |
| 73  | Lauraceae       | ni.4                                       | louro fofo                  | 1  | 5.2       | 7.8        | 0.656 | fam | mid | 21.6        |
| 74  | Lauraceae       | <i>Ocotea</i> spp.                         | louro preto                 | 4  | 7.0-36.2  | 10.0-27.0  | 0.598 | gen | lat | 25.2-2162.6 |
| 75  | Lauraceae       | <i>Rhodostemonodaphne</i> spp.             | louro peludo                | 1  | 6.5       | 12.2       | 0.395 | gen | mid | 35.6        |
| 76  | Lecythidaceae   | <i>Cariniana integrifolia</i> Ducke        | tauari                      | 6  | 5.0-7.5   | 6.4-10.0   | 0.490 | spp | lat | 12.2-29.1   |
| 77  | Lecythidaceae   | <i>Couratari</i> sp.                       | tauari vermelho             | 1  | 5.2       | 10.5       | 0.549 | gen | lat | 19.9        |
| 78  | Lecythidaceae   | <i>Eschweilera atropetiolata</i> S.A. Mori | castanha vermelha           | 1  | 20.4      | 25.5       | 0.753 | spp | lat | 715.2       |
| 79  | Lecythidaceae   | <i>Eschweilera collina</i> Eyma            | ripeiro branco              | 2  | 7.7-15.7  | 11.2-17.7  | 0.778 | spp | lat | 20.5-178.0  |
| 80  | Lecythidaceae   | <i>Eschweilera</i> spp.                    | matamata                    | 8  | 5.1-34.3  | 8.6-28.0   | 0.810 | gen | lat | 19.6-2588.0 |
| 81  | Lecythidaceae   | <i>Gustavia cf. elliptica</i>              | mucurão                     | 3  | 7.0-10.2  | 8.2-13.1   | 0.648 | gen | mid | 22.3-93.9   |
| 82  | Lecythidaceae   | <i>Lecythis barnebyi</i> S.A. Mori         | castanha jarana             | 2  | 7.0-31.0  | 8.3-24.7   | 0.821 | gen | lat | 22.9-1785.8 |
| 83  | Lecythidaceae   | <i>Lecythis graciana</i> S.A. Mori         | castanha jarana folha miúda | 1  | 16.5      | 18.0       | 0.830 | spp | lat | 348.6       |
| 84  | Lecythidaceae   | <i>Lecythis</i> sp.                        | ripeiro vermelho            | 1  | 42.4      | 27.6       | 0.821 | gen | lat | 3999.8      |
| 85  | Lecythidaceae   | ni.5                                       |                             | 1  | 5.5       | 9.5        | 0.713 | fam | lat | 18.0        |
| 86  | Malpighiaceae   | <i>Byrsonima duckeana</i> W.R. Anderson    | murici vermelho             | 23 | 5.6-25.7  | 9.0-22.1   | 0.671 | gen | pio | 21.9-1036.6 |
| 87  | Malvaceae       | <i>Scleronema micranthum</i> (Ducke) Ducke | cardeiro                    | 2  | 11.5-38.4 | 13.2-27.6  | 0.595 | spp | mid | 75.2-2298.9 |
| 88  | Malvaceae       | <i>Theobroma sylvestre</i> Aubl. ex Mart.  | cacaúí                      | 1  | 5.3       | 10.4       | 0.470 | spp | mid | 20.4        |
| 89  | Melastomataceae | <i>Bellucia dichotoma</i> Cogn.            | goiaba de anta              | 7  | 6.3-24.5  | 9.0-21.8   | 0.607 | gen | pio | 30.5-775.6  |
| 90  | Melastomataceae | <i>Miconia argyrophylla</i> DC.            | buxuxu canela de velho      | 3  | 5.1-26.0  | 8.2-22.0   | 0.637 | gen | pio | 14.1-426.0  |
| 91  | Melastomataceae | <i>Miconia minutiflora</i> (Bonpl.) DC.    | tinteira, tintarana         | 4  | 6.0-13.3  | 6.3-18.2   | 0.637 | gen | mid | 32.5-219.2  |
| 92  | Melastomataceae | <i>Miconia</i> spp.                        | buxuxu                      | 24 | 5.3-13.7  | 7.8-15.6   | 0.637 | gen | pio | 13.9-198.4  |
| 93  | Melastomataceae | <i>Mouriri</i> sp.                         | mamãozinho                  | 1  | 63.2      | 32.0       | 0.740 | gen | mid | 6655.1      |
| 94  | Meliaceae       | <i>Guarea</i> spp.                         | gitó vermelho               | 8  | 5.2-7.3   | 7.2-11.4   | 0.652 | gen | lat | 12.9-30.7   |
| 95  | Meliaceae       | <i>Trichilia</i> sp.                       | gitó branco                 | 1  | 5.5       | 10.7       | 0.740 | gen | lat | 17.2        |
| 96  | Moraceae        | <i>Brosimum rubescens</i> Taub.            | pau rainha                  | 1  | 10.5      | 14.8       | 0.878 | spp | lat | 101.9       |
| 97  | Moraceae        | <i>Brosimum</i> spp.                       | muiratinga                  | 4  | 6.1-8.5   | 8.1-11.0   | 0.666 | gen | mid | 14.2-57.2   |
| 98  | Moraceae        | <i>Helianthostylis sprucei</i> Baill.      | falsa rainha                | 1  | 9.8       | 10.4       | 0.628 | spp | mid | 63.1        |
| 99  | Moraceae        | <i>Pseudolmedia</i> sp.                    | muiratinga                  | 1  | 13.7      | 19.0       | 0.630 | gen | mid | 182.9       |
| 100 | Moraceae        | <i>Sorocea guillemianiana</i> Gaudich.     | jaca brava                  | 2  | 5.3-5.7   | 8.0        | 0.612 | gen | mid | 11.8-12.2   |
| 101 | Myristicaceae   | <i>Iryanthera juruensis</i> Warb.          | ucuúba punã                 | 3  | 10.1-22.0 | 12.85-22.0 | 0.663 | spp | mid | 65.1-544.5  |
| 102 | Myristicaceae   | <i>Iryanthera lancifolia</i> Ducke         | ucuúba vermelha             | 1  | 8.5       | 10.9       | 0.634 | gen | mid | 38.1        |
| 103 | Myristicaceae   | <i>Iryanthera</i> sp.                      | ucuúba                      | 1  | 32.0      | 25.0       | 0.634 | gen | mid | 1036.6      |
| 104 | Myristicaceae   | <i>Virola michelii</i> Heckel              | ucuúba preta                | 1  | 8.7       | 13.0       | 0.529 | spp | mid | 58.8        |
| 105 | Myrtaceae       | <i>Eugenia</i> spp.                        | araçá                       | 3  | 5.9-6.8   | 8.4-9.8    | 0.742 | gen | mid | 21.3-24.7   |

|     |               |                                                                            |                               |    |           |           |       |     |     |             |
|-----|---------------|----------------------------------------------------------------------------|-------------------------------|----|-----------|-----------|-------|-----|-----|-------------|
| 106 | Myrtaceae     | ni.6                                                                       | araçá bravo                   | 3  | 8.0-14.1  | 14.1-17.0 | 0.788 | fam | mid | 64.8-230.7  |
| 107 | Nyctaginaceae | <i>Neea</i> spp.                                                           | joão mole                     | 5  | 5.9-9.3   | 6.8-9.0   | 0.631 | gen | mid | 17.3-38.4   |
| 108 | Ochnaceae     | <i>Ouratea</i> cf. <i>dischophora</i>                                      | uchí de morcego               | 2  | 5.3-11.1  | 12.3-14.8 | 0.743 | gen | mid | 35.0-123.0  |
| 109 | Olacaceae     | ni.7                                                                       |                               | 1  | 27.0      | 24.0      | 0.692 | fam | lat | 926.3       |
| 110 | Peraceae      | <i>Pera schomburgkiana</i> (Klotzsch) Müll. Arg.                           | pera                          | 1  | 6.2       | 11.0      | 0.590 | spp | mid | 30.4        |
| 111 | Rubiaceae     | <i>Amaioua guianensis</i> Aubl.                                            | muiraximbé                    | 1  | 6.0       | 8.3       | 0.670 | spp | mid | 19.8        |
| 112 | Rubiaceae     | <i>Faramea</i> spp.                                                        | taboquinha                    | 3  | 6.0-15.0  | 7.7-17.9  | 0.618 | gen | mid | 23.9-134.7  |
| 113 | Rubiaceae     | <i>Psychotria</i> spp.                                                     | taboca mata gado              | 2  | 6.2-6.9   | 8.5-10.6  | 0.564 | gen | mid | 29.5-39.0   |
| 114 | Rutaceae      | <i>Zanthoxylum</i> sp.                                                     | limãozinho                    | 1  | 6.1       | 7.0       | 0.602 | gen | mid | 13.5        |
| 115 | Salicaceae    | <i>Casearia arborea</i> (Rich.) Urb.                                       | piabinha                      | 4  | 5.5-9.5   | 9.4-15.0  | 0.535 | spp | pio | 37.9-93.0   |
| 116 | Salicaceae    | <i>Laetia procera</i> (Poepp.) Eichler                                     | periquiteira                  | 86 | 5.2-15.8  | 4.9-20.3  | 0.664 | spp | pio | 7.8-244.7   |
| 117 | Sapindaceae   | <i>Toulicia guianensis</i> Aubl.                                           | pitomba da mata               | 3  | 7.8-9.7   | 13.0-14.7 | 0.756 | spp | mid | 33.5-80.0   |
| 118 | Sapotaceae    | <i>Chrysophyllum</i> cf. <i>prieurii</i>                                   | abiurana sabiá, abiurana roxa | 1  | 38.6      | 28.8      | 0.715 | gen | lat | 2890.4      |
| 119 | Sapotaceae    | <i>Micropholis guyanensis</i> subsp. <i>guyanensis</i> (Baehni) T.D. Penn. | maparajuba, balata brava      | 1  | 19.4      | 23.3      | 0.663 | spp | lat | 445.7       |
| 120 | Sapotaceae    | <i>Micropholis</i> sp.                                                     | balata rosada, chiclete bravo | 1  | 31.0      | 27.0      | 0.676 | spp | lat | 1535.2      |
| 121 | Sapotaceae    | <i>Pouteria anomala</i> (Pires) T.D. Penn.                                 | abiurana olho de veado        | 1  | 45.0      | 32.7      | 0.765 | spp | lat | 3729.8      |
| 122 | Sapotaceae    | <i>Pouteria manaosensis</i> (Aubrév. & Pellegr.) T.D. Penn.                | abiurana roxa                 | 1  | 6.2       | 8.3       | 0.640 | spp | lat | 21.7        |
| 123 | Sapotaceae    | <i>Pouteria oblanceolata</i> Pires                                         | cucutiriba folha peluda       | 2  | 8.8-13.7  | 11.8-21.0 | 0.790 | spp | lat | 79.4-234.9  |
| 124 | Sapotaceae    | <i>Pouteria</i> spp.                                                       | abiurana                      | 5  | 7.3-44.0  | 12.2-24.0 | 0.801 | gen | lat | 45.4-2934.2 |
| 125 | Simaroubaceae | <i>Simarouba amara</i> Aubl.                                               | marupá                        | 1  | 27.5      | 21.5      | 0.404 | spp | pio | 555.6       |
| 126 | Siparunaceae  | <i>Siparuna</i> cf. <i>guianensis</i>                                      | caápitiú                      | 10 | 5.4-9.3   | 4.5-13.0  | 0.593 | gen | mid | 15.9-92.2   |
| 127 | Urticaceae    | <i>Cecropia purpurascens</i> C.C. Berg                                     | imbaúba roxa                  | 3  | 11.8-15.5 | 14.8-16.5 | 0.430 | spp | pio | 63.9-106.4  |
| 128 | Urticaceae    | <i>Cecropia sciadophylla</i> Mart.                                         | imbaúba gigante               | 33 | 8.4-37.2  | 10.9-23.0 | 0.412 | spp | pio | 21.6-1543.6 |
| 129 | Urticaceae    | <i>Pourouma</i> sp.                                                        | imbaubarana                   | 1  | 17.3      | 18.0      | 0.389 | gen | pio | 125.9       |
| 130 | Urticaceae    | <i>Pourouma tomentosa</i> Mart. ex Miq.                                    | imbaubarana                   | 4  | 5.7-29.7  | 8.5-20.0  | 0.395 | spp | pio | 8.5-797.8   |
| 131 | Verbenaceae   | <i>Aegiphila</i> sp.                                                       | tabaco bravo                  | 2  | 18.4-20.0 | 12.4-20.1 | 0.555 | gen | pio | 113.3-253.2 |
| 132 | Violaceae     | <i>Leonia cymosa</i> Mart.                                                 | mucurão                       | 1  | 11.4      | 11.1      | 0.673 | gen | mid | 85.0        |
| 133 | Violaceae     | <i>Rinorea racemosa</i> (Mart.) Kuntze                                     | branquinha, canela de jacamim | 9  | 5.0-10.5  | 8.0-18.0  | 0.682 | spp | mid | 14.6-114.8  |
| 134 | Violaceae     | <i>Rinorea</i> cf. <i>guianensis</i>                                       | falsa cupiúba                 | 5  | 5.3-23.4  | 9.4-24.0  | 0.709 | gen | mid | 18.1-751.9  |
| 135 | Vochysiaceae  | <i>Erismia bracteosum</i> Ducke                                            | quaruba                       | 3  | 5.4-7.1   | 7.0-8.9   | 0.533 | gen | lat | 15.2-27.0   |

4 Species' attributes: botanic family (Family) and species' name (Species) accordingly to the APGIII system (Stevens, 2012); species' common  
5 name in Central Amazon (Common name); number of trees (NT); diameter at breast height (DBH) (cm); tree total height (*H*) (m); wood density  
6 (WD) (g cm<sup>-3</sup>); wood density assignment level (WD level) (value at species level [spp], value at genus level [gen] and value at family level

7 [fam]); species' successional group (SG) (pioneer species [pio], mid-successional species [mid] and late-successional species [lat]); and  
 8 aboveground biomass (AGB) (dry mass in kg).

9

10 Table S2. Attributes used to assign tree species into successional groups.

| SG  | Architecture, morphology and anatomy |          |          |               |                 |                     | Ecology and life history |                                 |          |
|-----|--------------------------------------|----------|----------|---------------|-----------------|---------------------|--------------------------|---------------------------------|----------|
|     | BFo                                  | CPo      | CSi      | CCo           | mDBH            | mWD                 | GAs                      | NRe                             | DMo      |
| pio | pla, ort                             | can, eme | med, lar | rou, ell, irr | 12.4 (5.1,37.2) | 0.573 (0.348,0.671) | yes                      | BW4, BW7, BW14, BW17, SE14, SGa | ane, zoo |
| mid | ort                                  | und, can | sma, med | elo, con, irr | 9.8 (5.0,35.5)  | 0.656 (0.395,0.833) | yes                      | BW17, BW24, BW27, SE23, OG, SGa | zoo, ane |
| lat | unb                                  | can, eme | med, lar | rou, ell      | 14.0 (5.0,85.0) | 0.735 (0.480,1.000) | no                       | BW24, BW27, OG                  | aut, zoo |

11 Attributes<sub>[references]</sub>: species' successional group (SG) (pioneer species [pio], mid-successional species [mid] and late-successional species [lat])<sub>[1]</sub>;  
 12 predominant branch form (BFo) (plagiotropic [pla], orthotropic [ort] and unbranched [unb])<sub>[2,3]</sub>; general vertical crown position of a mature tree  
 13 (CPo) (understory/supressed crown [und], canopy/co-dominant crown [can] and emergent crown [eme])<sub>[2,3]</sub>; relative crown size of a mature tree  
 14 (CSi)(small-sized crown [sma], mediun-sized crown [med] and larged-size crown [lar])<sub>[2,3]</sub>; general crown contour of a mature tree (CCo) (round  
 15 [rou], elliptic [ell], elongated [elo], conic [con] and irregular [irr])<sub>[2,3,4]</sub>; mean diameter at breast height (DBH) (cm) (minimum and maximum) of  
 16 the trees included in this study (mDBH)<sub>[5]</sub>; mean wood density (g cm<sup>-3</sup>) (minimum and maximum) of the tree species included in this study  
 17 (mWD)<sub>[5]</sub>; gap-associated species (GAs)<sub>[3]</sub>; natural regeneration niche mostly observed (NRe)<sub>[3]</sub>; major seed dispersion mode (DMo)  
 18 (anemochory [ane], autochory [aut] and zoochory [zoo])<sub>[6]</sub>. References: [1] Amaral et al., 2009; Chambers et al., 2009; Kammesheidt, 2000;  
 19 Marra et al., 2014; Saldarriaga et al., 1998; Swaine and Whitmore, 1988; [2] Hallé, 1974; Hallé et al., 1978; allometric data from this study  
 20 (Table S1); [3] Network of permanent plots including an old-growth (OG) forest (LMF unpublished data [census from 1996 to 2012] and Silva et  
 21 al., 2002), a four year-old blowdown (BW4) (Marra et al., 2014), a seven year-old blowdown (BW7), a 14 year-old blowdown (BW14), a 17  
 22 year-old blowdown (BW17), a 24 year-old blowdown (BW24), a 27 year-old blowdown (BW27) (LMF unpublished data), a 14 year-old slash

23 and burn secondary forest (SE14), a 23 year-old clear cut secondary forest (SE23) (Lima et al., 2007; Silva, 2007) and small (< c. 2000 m<sup>2</sup>)  
 24 canopy gaps (SGa) (LMF unpublished data [1996-2012 census]); [4] Myers, 1982; Trichon, 2001; [5] Dataset from this study (Table 1 and Table  
 25 S1); [6] Camargo et al., 2008; Ferraz et al., 2004; Ribeiro et al., 1999; Saravy et al., 2003; Silva Junior and Pereira, 2009; Stefanello et al., 2009,  
 26 2010; Terborgh et al., 2008.

27

28 Table S3. Parameters (low [2.5%] and high [97.5%] confidence interval) of the 24 tree aboveground biomass estimation models fit in this study.  
 29 See the Table 2 for checking the equations and variance modeling approaches, and the Table 3 for checking models' statistics.

| Model series | Model | SG                  | b1                     | b2                   | b3                  | b4                  | c1                   | c2                  |
|--------------|-------|---------------------|------------------------|----------------------|---------------------|---------------------|----------------------|---------------------|
| 1            | M11   |                     | 1.010 (0.858,1.179)    | 2.052 (2.012,2.093)  |                     |                     | 190.5 (180.8,200.4)  |                     |
|              | M12   |                     | -1.148 (-1.262,-1.031) | 2.338 (2.289,2.386)  |                     |                     | 0.359 (0.341,0.378)  |                     |
|              | M13   |                     | 0.336 (0.299,0.377)    | 2.339 (2.290,2.387)  |                     |                     | 0.106 (0.085,0.132)  | 2.374 (2.285,2.464) |
| 2            | M21   | pio                 | 0.496 (0.262,0.835)    | 2.191 (2.018,2.371)  |                     |                     | 148.8 (141.6,156.7)  |                     |
|              |       | mid                 | 0.248 (0.082,0.521)    | 2.499 (2.243,2.795)  |                     |                     |                      |                     |
|              |       | lat                 | 4.284 (3.632,4.989)    | 1.714 (1.675,1.754)  |                     |                     |                      |                     |
|              | M22   | pio                 | -0.874 (-1.049,-0.705) | 2.203 (2.133,2.274)  |                     |                     | 0.345 (0.328, 0.365) |                     |
|              |       | mid                 | -1.296 (-1.544,-1.053) | 2.400 (2.290, 2.512) |                     |                     |                      |                     |
|              |       | lat                 | -1.335 (-1.535,-1.140) | 2.481 ( 2.402,2.562) |                     |                     |                      |                     |
| M23          | pio   | 0.445 (0.375,0.522) | 2.202 (2.135,2.271)    |                      |                     | 0.151 (0.107,0.209) | 2.199 (2.061,2.335)  |                     |
|              | mid   | 0.297 (0.235,0.377) | 2.394 (2.289,2.487)    |                      |                     | 0.234 (0.138,0.372) | 2.038 (1.820,2.264)  |                     |
|              | lat   | 0.269 (0.228,0.314) | 2.489 (2.422,2.554)    |                      |                     | 0.060 (0.037,0.092) | 2.574 (2.401,2.756)  |                     |
| 3            | M31   |                     | 1.714 (1.502,1.953)    | 2.036 (2.002,2.069)  | 1.035 (0.944,1.126) |                     | 144.3 (137.1,152.0)  |                     |
|              | M32   |                     | -0.869 (-0.986,-0.753) | 2.375 (2.329,2.420)  | 0.749 (0.624,0.876) |                     | 0.329 (0.313,0.347)  |                     |

|   |     |     |                        |                     |                       |                     |                     |                     |
|---|-----|-----|------------------------|---------------------|-----------------------|---------------------|---------------------|---------------------|
|   | M33 |     | 0.415 (0.373,0.460)    | 2.401 (2.361,2.439) | 0.755 (0.631,0.881)   |                     | 0.150 (0.119,0.186) | 2.189 (2.097,2.282) |
| 4 | M41 | pio | 0.332 (0.181,0.548)    | 2.577 (2.398,2.767) | 1.233 (0.981,1.492)   |                     | 130.5 (124.1,137.6) |                     |
|   |     | mid | 0.244 (0.097,0.479)    | 2.484 (2.238,2.760) | -0.070 (-0.582,0.458) |                     |                     |                     |
|   |     | lat | 3.293 (2.797,3.832)    | 1.848 (1.804,1.893) | 0.716 (0.591,0.841)   |                     |                     |                     |
|   | M42 | pio | -0.552 (-0.724,-0.378) | 2.279 (2.211,2.346) | 0.875 (0.692,1.055)   |                     | 0.323 (0.307,0.341) |                     |
|   |     | mid | -1.193 (-1.465,-0.913) | 2.408 (2.306,2.510) | 0.284 (-0.125,0.683)  |                     |                     |                     |
|   |     | lat | -1.141 (-1.364,-0.919) | 2.468 (2.394,2.544) | 0.510 (0.185,0.829)   |                     |                     |                     |
|   | M43 | pio | 0.539 (0.454,0.640)    | 2.326 (2.251,2.397) | 0.880 (0.687,1.079)   |                     | 0.217 (0.151,0.300) | 2.005 (1.868,2.150) |
|   |     | mid | 0.362 (0.268,0.490)    | 2.395 (2.285,2.494) | 0.464 (0.054,0.956)   |                     | 0.211 (0.205,0.329) | 2.082 (1.874,2.304) |
|   |     | lat | 0.323 (0.270,0.386)    | 2.475 (2.409,2.538) | 0.481 (0.222,0.750)   |                     | 0.059 (0.037,0.090) | 2.561 (2.389,2.744) |
| 5 | M51 |     | 0.078 (0.051,0.114)    | 1.561 (1.492,1.636) | 1.347 (1.152,1.527)   |                     | 164.3 (156.2,173.0) |                     |
|   | M52 |     | -2.098 (-2.290,-1.912) | 1.928 (1.847,2.010) | 0.735 (0.615,0.856)   |                     | 0.329 (0.312,0.346) |                     |
|   | M53 |     | 0.147 (0.117,0.179)    | 1.971 (1.884,2.057) | 0.650 (0.523,0.781)   |                     | 0.092 (0.073,0.116) | 2.405 (2.310,2.501) |
| 6 | M61 | pio | 0.029 (0.007,0.076)    | 1.926 (1.729,2.125) | 1.252 (0.860,1.632)   |                     | 134.1 (127.2,141.1) |                     |
|   |     | mid | 0.144 (0.052,0.316)    | 2.173 (1.822,2.543) | 0.508 (0.036,0.900)   |                     |                     |                     |
|   |     | lat | 0.697 (0.454,1.041)    | 1.414 (1.343,1.482) | 0.896 (0.709,1.077)   |                     |                     |                     |
|   | M62 | pio | -1.946 (-2.238,-1.663) | 1.820 (1.713,1.930) | 0.751 (0.583,0.921)   |                     | 0.314 (0.298,0.331) |                     |
|   |     | mid | -2.101 (-2.405,-1.799) | 1.900 (1.740,2.062) | 0.762 (0.562,0.958)   |                     |                     |                     |
|   |     | lat | -2.223 (-2.665,-1.814) | 2.099 (1.914,2.271) | 0.688 (0.406,1.001)   |                     |                     |                     |
|   | M63 | pio | 0.170 (0.118,0.234)    | 1.870 (1.757,1.984) | 0.664 (0.471,0.863)   |                     | 0.140 (0.098,0.192) | 2.202 (2.067,2.341) |
|   |     | mid | 0.147 (0.101,0.207)    | 1.970 (1.796,2.149) | 0.655 (0.414,0.883)   |                     | 0.193 (0.112,0.309) | 2.090 (1.866,2.328) |
|   |     | lat | 0.120 (0.083,0.169)    | 2.141 (2.000,2.288) | 0.626 (0.379,0.861)   |                     | 0.056 (0.035,0.084) | 2.563 (2.388,2.742) |
| 7 | M71 |     | 0.143 (0.099,0.192)    | 1.577 (1.517,1.631) | 1.273 (1.136,1.435)   | 0.955 (0.881,1.028) | 118.0 (112.1,124.2) |                     |
|   | M72 |     | -1.733 (-1.921,-1.541) | 2.010 (1.934,2.085) | 0.643 (0.530,0.756)   | 0.654 (0.537,0.769) | 0.305 (0.290,0.321) |                     |
|   | M73 |     | 0.186 (0.149,0.227)    | 2.096 (2.017,2.170) | 0.706 (0.584,0.831)   | 0.573 (0.449,0.698) | 0.143 (0.112,0.181) | 2.183 (2.083,2.285) |



|   |     |     |                        |                     |                     |                      |                     |                     |  |
|---|-----|-----|------------------------|---------------------|---------------------|----------------------|---------------------|---------------------|--|
| 8 | M81 | pio | 0.062 (0.023,0.135)    | 2.318 (2.121,2.512) | 0.802 (0.485,1.121) | 1.010 (0.785,1.239)  | 108.4 (103.0,114.4) |                     |  |
|   |     | mid | 0.074 (0.019,0.175)    | 2.078 (1.760,2.385) | 0.933 (0.409,1.516) | 0.658 (0.063,1.294)  |                     |                     |  |
|   |     | lat | 0.243 (0.168,0.345)    | 1.479 (1.422,1.539) | 1.224 (1.061,1.368) | 0.851 (0.754,0.948)  |                     |                     |  |
|   | M82 | pio | -1.403 (-1.718,-1.397) | 1.981 (1.873,2.092) | 0.555 (0.385,0.731) | 0.713 (0.534,0.886)  | 0.300 (0.284,0.317) |                     |  |
|   |     | mid | -2.011 (-2.323,-1.685) | 1.909 (1.757,2.065) | 0.757 (0.566,0.948) | 0.225 (-0.145,0.600) |                     |                     |  |
|   |     | lat | -1.982 (-2.447,-1.450) | 2.133 (1.954,2.335) | 0.609 (0.259,0.909) | 0.362 (0.054,0.676)  |                     |                     |  |
|   | M83 | pio | 0.254 (0.175,0.344)    | 2.082 (1.958,2.192) | 0.760 (0.570,0.954) | 0.479 (0.311,0.683)  | 0.209 (0.145,0.295) | 2.005 (1.860,2.151) |  |
|   |     | mid | 0.175 (0.113,0.255)    | 1.971 (1.791,2.137) | 0.446 (0.074,0.872) | 0.661 (0.445,0.901)  | 0.178 (0.103,0.286) | 2.124 (1.899,2.362) |  |
|   |     | lat | 0.150 (0.116,0.214)    | 2.173 (2.033,2.314) | 0.364 (0.117,0.617) | 0.558 (0.321,0.798)  | 0.058 (0.035,0.088) | 2.538 (2.362,2.730) |  |

30 Model series predictors: 1 (diameter at breast height [DBH]); 2 (DBH and species' successional group [SG]); 3 (DBH and wood density [WD]);  
31 4 (DBH, WD and SG); 5 (DBH and tree total height [ $H$ ]); 6 (DBH,  $H$  and SG); 7 (DBH,  $H$  and WD); and 8 (DBH,  $H$ , SG and WD). Species'  
32 successional group: pioneer species (pio), mid-successional species (mid) and late-successional species (lat).

33

34 Table S4. Root-mean-square error (RMSE) and bias (absolute and relative values) from tree aboveground biomass predictions made by using the  
35 Chave et al. (2014)'s pantropical estimation model. Predictions were made for all the six different successional scenarios included in this study.  
36 The Chave et al. (2014)'s pantropical estimation model has diameter at breast height (DBH), tree total height ( $H$ ) (estimated from a DBH:  $H$   
37 relationship), wood density (WD) and environmental stress as predictors.

| Scenarios        | RSME (Mg) | Bias (Mg) | Bias (%) |
|------------------|-----------|-----------|----------|
| Early-succession | 73.3      | -73.2     | -30.7    |
| Mid-succession   | 81.7      | -80.9     | -29.2    |
| Late-succession  | 115.0     | -114.1    | -27.9    |
| Small-sized      | 99.5      | -99.3     | -30.7    |
| Mid-sized        | 116.0     | -115.4    | -30.2    |

|             |       |        |       |
|-------------|-------|--------|-------|
| Large-sized | 130.2 | -130.2 | -29.6 |
| Mean        | 102.6 | -102.2 | -29.7 |

---

38

39 **Figures**

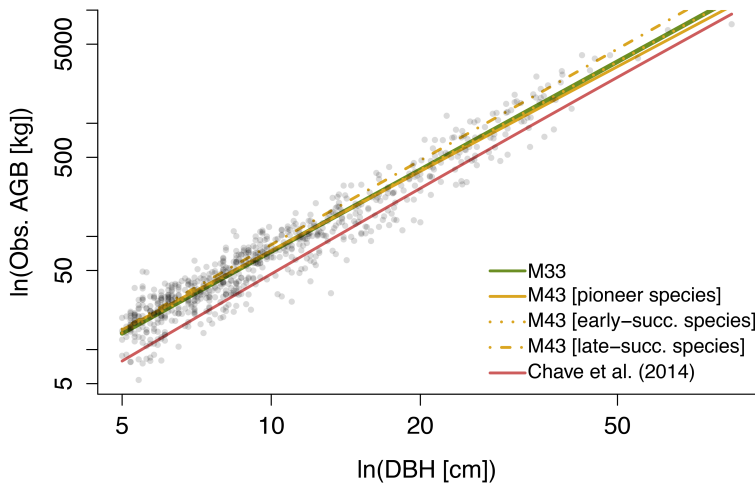

40

41 Figure S1. Fit of the two best tree aboveground estimation models parameterized in this  
 42 study (M33 and M43) and that from Chave et al. (2014)'s pantropical model. Note that the  
 43 pantropical model underestimates the biomass of the small-sized trees (diameter at breast  
 44 height < 21 cm). This pattern was also observed at the landscape-level (Fig. S2).

45

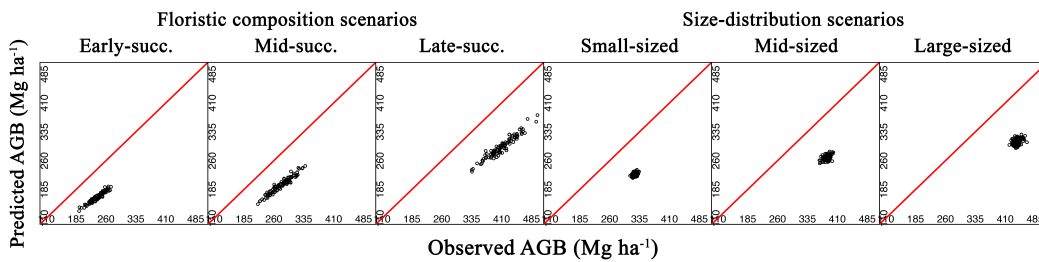

46

47 Figure S2. Predicted vs. observed aboveground biomass (AGB) along six forest-scenarios  
 48 composed of 100 1-ha plots. The line of equality (1:1 line) is shown as a red/straight line.  
 49 Forest scenarios were designed to reflect landscape-level variations in floristic composition  
 50 and size-distribution of trees, typical of Central Amazon terra firme forests. Floristic  
 51 composition and size-distribution scenarios followed the sampling scheme described in  
 52 section 2.4.2 (Fig. 2) of this study. Here, the predictions were made by using the Chave et  
 53 al. (2014)'s pantropical model, which has diameter at breast height (DBH), tree total height  
 54 ( $H$ ) (estimated from a DBH:  $H$  relationship), wood density (WD) and environmental stress  
 55 as predictors.

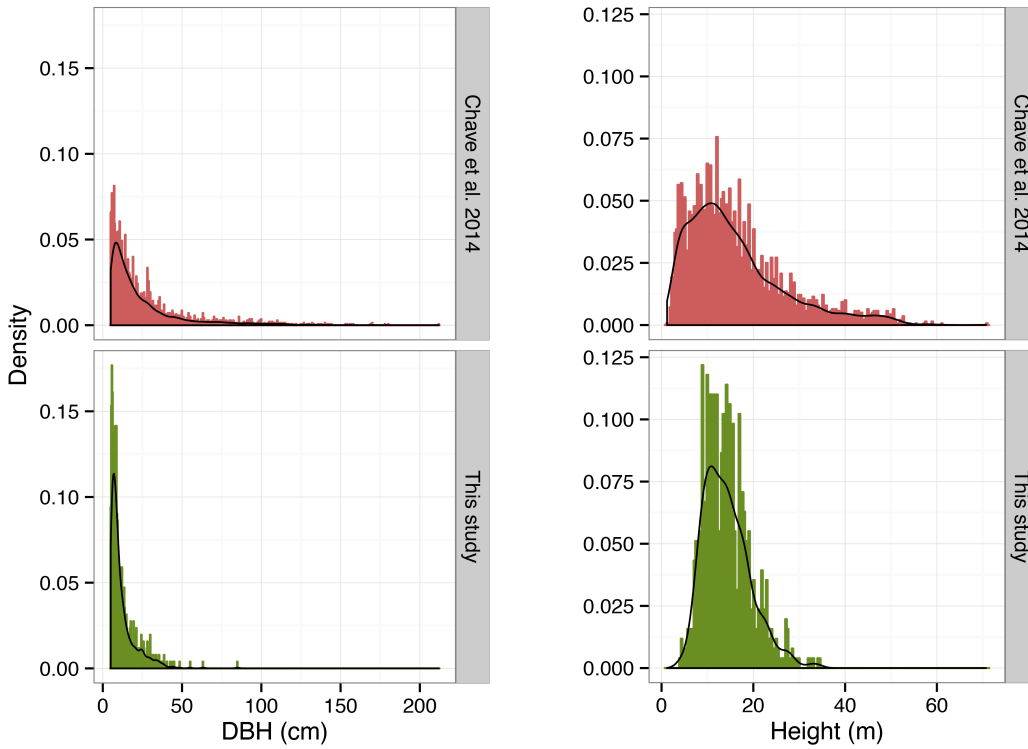

56

57 Figure S3. DBH- (diameter at breast height) and height-distribution of trees included in  
 58 Chave et al. (2014)'s pantropical model (n = 4004) and those from this study (n = 727).  
 59 Note the great density/probability difference for small- and large-sized trees between the  
 60 two datasets.

61

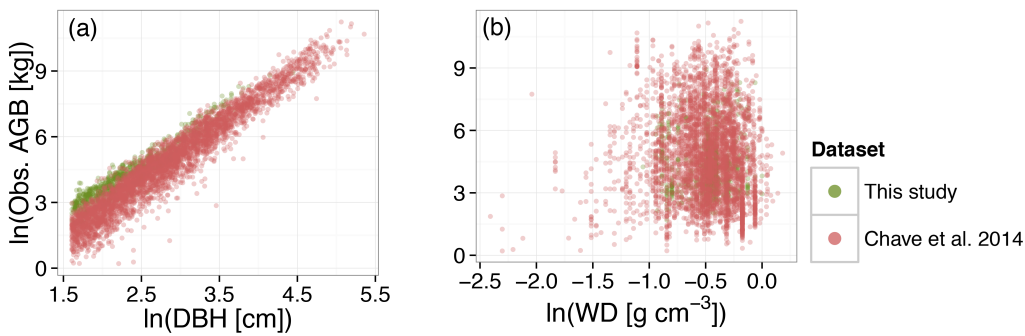

62

63 Figure S4. Relationship between predictors (diameter at breast height [DBH] and wood  
 64 density [WD]) and aboveground biomass (AGB) of the trees included in this study (n =  
 65 727) and those included in Chave et al. (2014)'s pantropical model (n = 4004).

66

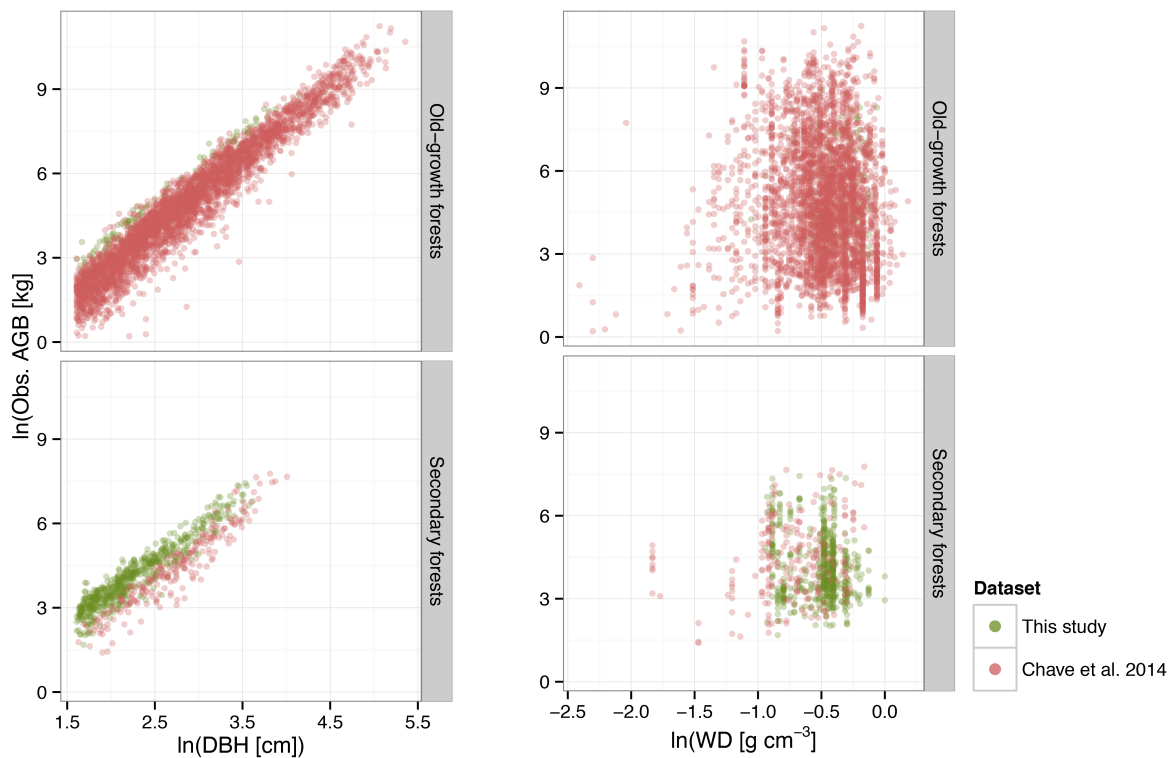

67

68 Figure S5. Relationship between predictors (diameter at breast height [DBH] and wood  
 69 density [WD]) and the observed aboveground biomass (AGB) of the trees from old-growth  
 70 and secondary forests used to parameterize the biomass estimation models fit in this study  
 71 and Chave et al. (2014)'s pantropical model. Note that this study included 596 trees (82%  
 72 of the total) harvested in secondary forests, while Chave et al. (2014) included only 220  
 73 (5% of the total). In this study, the representative amount of trees and species from  
 74 different successional stages of the same forest type allowed for the inclusion of a wide  
 75 range of tree architecture and thus allometries (i.e. from slender to stout trunks, from  
 76 suppressed or emergent late-successional species typical of old-growth forests, up to  
 77 competing or canopy/emergent pioneer species typical of large treefall gaps created by  
 78 wind-disturbance.

79

## 80 References

81 Amaral, D. D., Vieira, I. C. G., Almeida, S. S., Salomão, R. P., Silva, A. S. L. and Jardim,  
 82 M. A. G.: Checklist of remnant forest fragments of the metropolitan area of Belém and  
 83 historical value of the fragments, State of Pará, Brazil, Bol. Mus. Para. Emílio Goeldi,  
 84 4(3), 231–289, 2009.

85 Camargo, J., Ferraz, I., Mesquita, M., Santos, B. and Brum, H.: Guia de Propágulos &

- 86 Plântulas da Amazônia vol.1, 1st ed., edited by Authors, INPA, Manaus., 2008.
- 87 Chambers, J. Q., Robertson, A. L., Carneiro, V. M. C., Lima, A. J. N., Smith, M. L.,  
88 Plourde, L. C. and Higuchi, N.: Hyperspectral remote detection of niche partitioning  
89 among canopy trees driven by blowdown gap disturbances in the Central Amazon,  
90 *Oecologia*, 160(1), 107–117, 2009.
- 91 Chave, J., Réjou-Méchain, M., Búrquez, A., Chidumayo, E., Colgan, M. S., Delitti, W. B.  
92 C., Duque, A., Eid, T., Fearnside, P. M., Goodman, R. C., Henry, M., Martínez-Yrizar, A.,  
93 Mugasha, W., Muller-Landau, H. C., Mencuccini, M., Nelson, B. W., Ngomanda, A.,  
94 Nogueira, E. M., Ortiz-Malavassi, E., Pélissier, R., Ploton, P., Ryan, C. M., Saldarriaga, J.  
95 G. and Vieilledent, G.: Improved allometric models to estimate the aboveground biomass  
96 of tropical trees, *Glob. Chang. Biol.*, 3177–3190, 2014.
- 97 Ferraz, I., Leal Filho, N., Imakawa, A., Varela, V. and Piña-Rodríguez, C.: Basic  
98 characteristics for a preliminary ecological ranking of timber species occurring in a non-  
99 flooded forest in Central Amazonia, *Acta Amaz.*, 34(4), 621–633, 2004.
- 100 Hallé, F.: Architecture of trees in the rain forest of Morobe District, New Guinea,  
101 *Biotropica*, 6(1), 43–50, 1974.
- 102 Hallé, F., Oldeman, R. A. A. and Tomlinson, P. B.: Tropical trees and forests: an  
103 architectural analysis, Springer-Verlag., Berlin, German Federal Republic., 1978.
- 104 Kammesheidt, L.: Some autecological characteristics of early to late successional tree  
105 species in Venezuela, *Acta Oecologica*, 21(1), 37–48, 2000.
- 106 Lima, A. J. N., Teixeira, L. M., Carneiro, V. M. C., Santos, J. dos and Higuchi, N.: Análise  
107 da estrutura e do estoque de fitomassa de uma floresta secundária da região de Manaus  
108 AM, dez anos após corte raso seguido de fogo, *Acta Amaz.*, 37(1), 49–54, 2007.
- 109 Marra, D. M., Chambers, J. Q., Higuchi, N., Trumbore, S. E., Ribeiro, G. H. P. M., Santos,  
110 J. dos, Negrón-Juárez, R. ., Reu, B. and Wirth, C.: Large-scale wind disturbances promote  
111 tree diversity in a central Amazon forest., *PLoS One*, 9(8), e103711,  
112 doi:10.1371/journal.pone.0103711, 2014.
- 113 Myers, B. J.: Guide to the identification of some tropical rainforest species from large-  
114 scale colour aerial photographs, *Aust. For.*, 45(1), 28–41, 1982.
- 115 Ribeiro, J. E. L. S., Hopkins, M. J. G., Vicentini, A., Sothers, C. A., Costa, M. A. da S.,  
116 Brito, J. M. de, Souza, M. A. D. de, Martins, L. H. P., Lohmann, L. G., Assunção, P. A. C.

117 L., Pereira, E. da C., Silva, C. F. da, Mesquita, M. R. and Procópio, L. C.: Flora da Reserva  
118 Ducke: Guia de Identificação das Plantas Vasculares de uma Floresta de Terra-firme na  
119 Amazônia Central, INPA, Manaus., 1999.

120 Saldarriaga, J. G., West, D. C., Tharp, M. L. and Uhl, C.: Long-Term Chronossequence of  
121 Forest Succession in the Upper Rio Negro of Colombia and Venezuela, *J. Ecol.*, 76, 938–  
122 958, 1998.

123 Saravy, S., Freitas, P., Lage, M., Leite, S., Braga, L. and Souza, M.: Síndrome de dispesão  
124 em estratos arbóreos em um fragmento de floresta ombrófila aberta e densa em Alta  
125 Floresta MT, *Rev. do Programa Ciências Agro-Ambientais*, 2(1), 1–12, 2003.

126 Silva Junior, M. and Pereira, B.: + 100 Árvores do Cerrado -Matas de Galeria - Guia de  
127 Campo, 1st ed., Rede de Sementes do Cerrado, Brasília., 2009.

128 Silva, R. P. da: Alometria, estoque e dinâmica da biomassa de florestas primárias e  
129 secundárias na região de Manaus (AM), PhD Thesis, Universidade Federal do Amazonas,  
130 Brazil, available at: [http://www.inpa.gov.br/arquivos/Tese\\_Biomassa\\_Roseana\\_Silva.pdf](http://www.inpa.gov.br/arquivos/Tese_Biomassa_Roseana_Silva.pdf)  
131 (last access on 20.08.2015), 2007.

132 Silva, R. P. da, Santos, J. dos, Tribuzy, E. S., Chambers, J. Q., Nakamura, S. and Higuchi,  
133 N.: Diameter increment and growth patterns for individual tree growing in Central  
134 Amazon, Brazil, *For. Ecol. Manage.*, 166(1-3), 295–301, 2002.

135 Stefanello, D., Fernandes-Bulhão, C. and Martins, S. V.: Seed dispersal syndromes in three  
136 riparian vegetation sites (source, middle and estuary) along the Pindaíba river, Mato  
137 Grosso state, Brazil, *Rev. Árvore*, 33, 1051–1061, 2009.

138 Stefanello, D., Ivanauskas, N. M., Martins, S. V., Silva, E. and Kunz, S. H.: Syndromes of  
139 diaspores dispersal of species of riparian vegetation of the river from Pacas, Querência -  
140 MT, *Acta Amaz.*, 40(1), 141–150, 2010.

141 Stevens, P. F.: Angiosperm Phylogeny Website, version 12, available in:  
142 <http://www.mobot.org/MOBOT/research/APweb/> (last access on 20.08.2015), 2012.

143 Swaine, M. D. and Whitmore, T. C.: On the definition of ecological species groups in  
144 tropical rain forests, *Vegetatio*, 75(1-2), 81–86, 1988.

145 Terborgh, J., Nuñez-Iturri, G., Pitman, N. C. a, Valverde, F. H. C., Alvarez, P., Swamy, V.,  
146 Pringle, E. G. and Paine, C. E. T.: Tree recruitment in an empty forest, *Ecology*, 89(6),  
147 1757–1768, 2008.

148 Trichon, V.: Crown typology and the identification of rain forest trees on large-scale aerial  
149 photographs, *Plant Ecol.*, 153(1-2), 301–312, doi:10.1023/A:1017524126999, 2001.
